# Supplementary material
Source: publisher figshare collection journal article supplement (https://acs.figshare.com/ndownloader/files/3874627)
Supplement: Supplementary file 1 [file 3874627]

Figures supplementar legend:

**Supplementary information S1-S5:** Data sets for peptide data

**Supplementary information S6-S10:** Data sets for total protein identification - merged samples in triplicate.

**Supplementary information S11-S14:** Differential expressed data sets for breast cancer subtypes against control samples.

**Supplementar file S15:** The top 3 scored maps (map with the lowest p-value) from Luminal A x Healthy donors analysis based on the enrichment distribution sorted by 'Statistically significant Maps' set. Up-ward thermometers have red color and indicate up-regulated signals and down-ward (blue) ones indicate down-regulated expression levels of the genes.

**Supplementar file S16:** The top 3 scored maps (map with the lowest p-value) from Luminal Her x Healthy donors analysis based on the enrichment distribution sorted by 'Statistically significant Maps' set. Up-ward thermometers have red color and indicate up-regulated signals and down-ward (blue) ones indicate down-regulated expression levels of the genes.

**Supplementar file S17:** The top 3 scored maps (map with the lowest p-value) from Her x Healthy donors analysis based on the enrichment distribution sorted by 'Statistically significant Maps' set. Up-ward thermometers have red color and indicate up-regulated signals and down-ward (blue) ones indicate down-regulated expression levels of the genes.

**Supplementar file S18:** The top 3 scored maps (map with the lowest p-value) from Triple Negative x Healthy donors analysis based on the enrichment distribution sorted by 'Statistically significant Maps' set. Up-ward thermometers have red color and indicate up-regulated signals and down-ward (blue) ones indicate down-regulated expression levels of the genes.
